# Supplementary material for: Enzymatic Synthesis and Structural Modeling of Bio-Based Oligoesters as an Approach for the Fast Screening of Marine Biodegradation and Ecotoxicity
Source: MDPI journal article supplement (doi:10.3390/ijms25105433), 2024-05-16
Supplement: s1 [file s1]

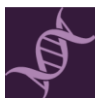

Supplementary Materials

# Enzymatic synthesis and structural modelling of bio-based oligoesters as an approach for fast screening of marine biodegradation and ecotoxicity

Anamaria Todea <sup>1,2\*</sup>, Ioan Bîtcan <sup>1,2</sup>, Marco Giannetto <sup>1</sup>, Iulia Ioana Rădoi <sup>1</sup>, Raffaele Bruschi <sup>1,3</sup>, Monia Renzi <sup>3</sup>, Serena Anselmi <sup>4</sup>, Francesca Provenza <sup>4</sup>, Tecla Bentivoglio <sup>4</sup>, Fioretta Asaro <sup>1</sup>, Emanuele Carosati <sup>1</sup> and Lucia Gardossi <sup>1</sup>

<sup>1</sup> Department of Chemical and Pharmaceutical Sciences, University of Trieste, Via L. Giorgieri 1, 34127 Trieste TS, Italy

<sup>2</sup> University Politehnica Timisoara, Faculty of Industrial Chemistry and Environmental Engineering, 300001, C. Telbisz 6, 300001 Timisoara, Romania

<sup>3</sup> Department of Life Sciences, University of Trieste, via L. Giorgieri, 10 34127 Trieste TS, Italy

<sup>4</sup> Bioscience Research Center, via Aurelia Vecchia, 32, 58015 Orbetello, Italy.

\* Correspondence: atodea@units.it (A.T.)

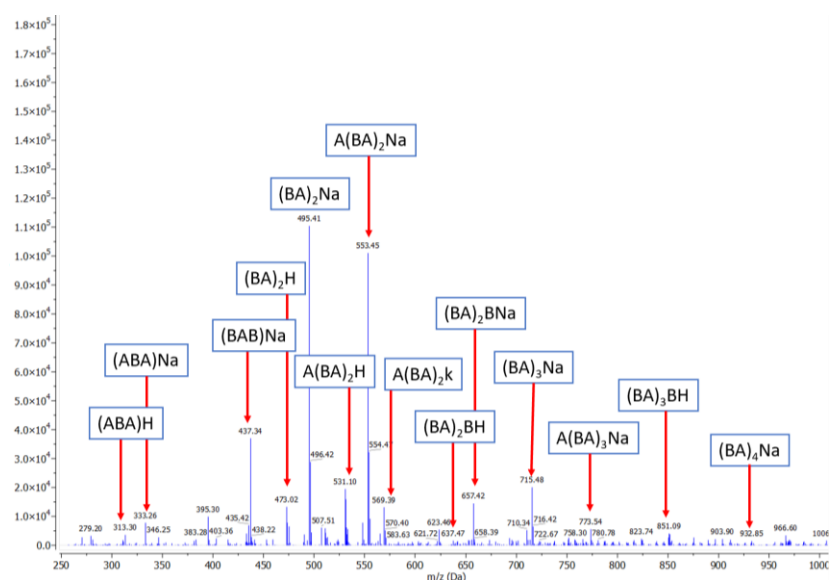

**Figure S1.** The ESI-MS spectrum of the enzymatically synthesized poly(butylene terephthalate) obtained in *t*-BuOH at 70°C in the presence of Novozyme 435 lipase.

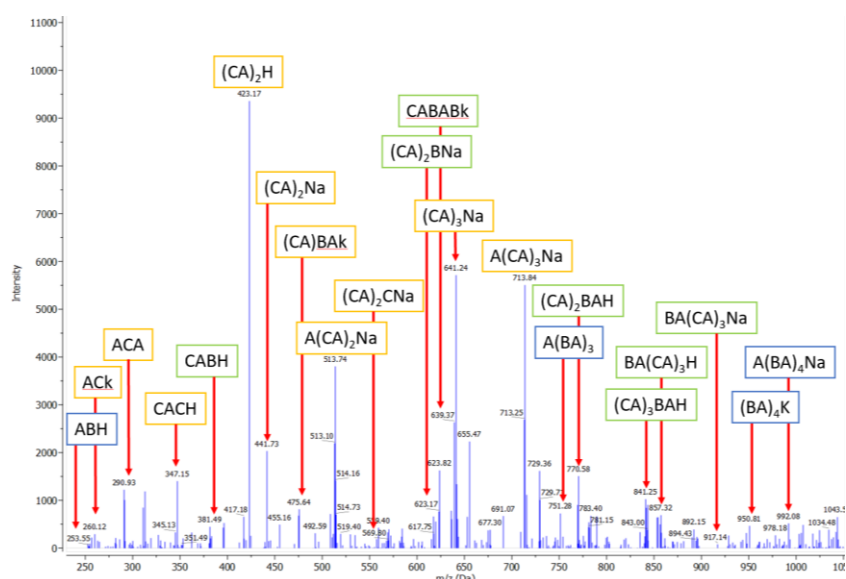

**Figure S2.** The ESI-MS spectrum of the enzymatically synthesized poly(butylene adipate terephthalate) obtained in *t*-BuOH at 70°C in the presence of Novozyme 435.

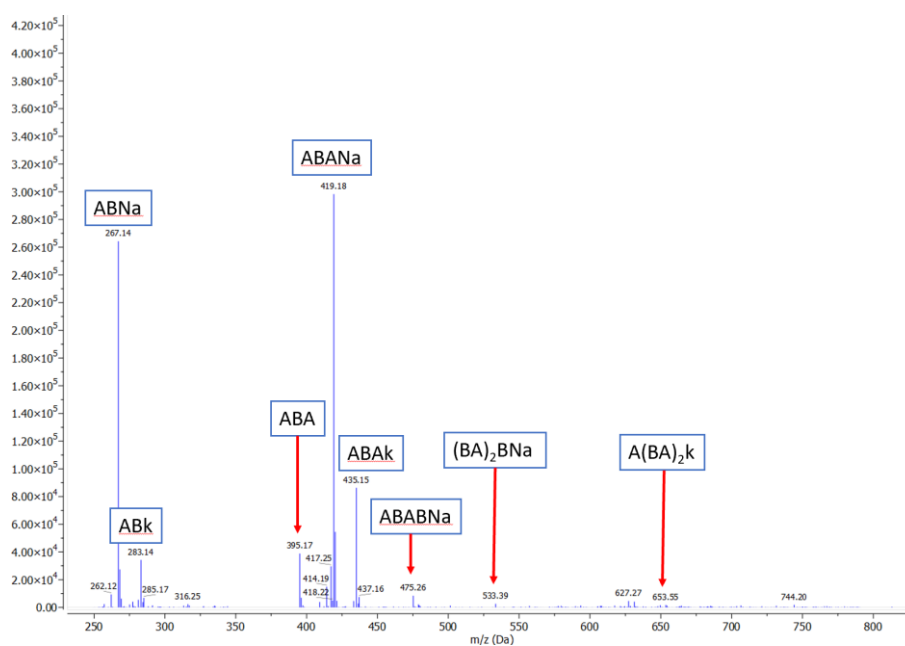

**Figure S3.** The ESI-MS spectrum of the enzymatically synthesized poly(glycerol furanoate) obtained in *t*-BuOH at 70°C in the presence of covalently immobilized CalB lipase.

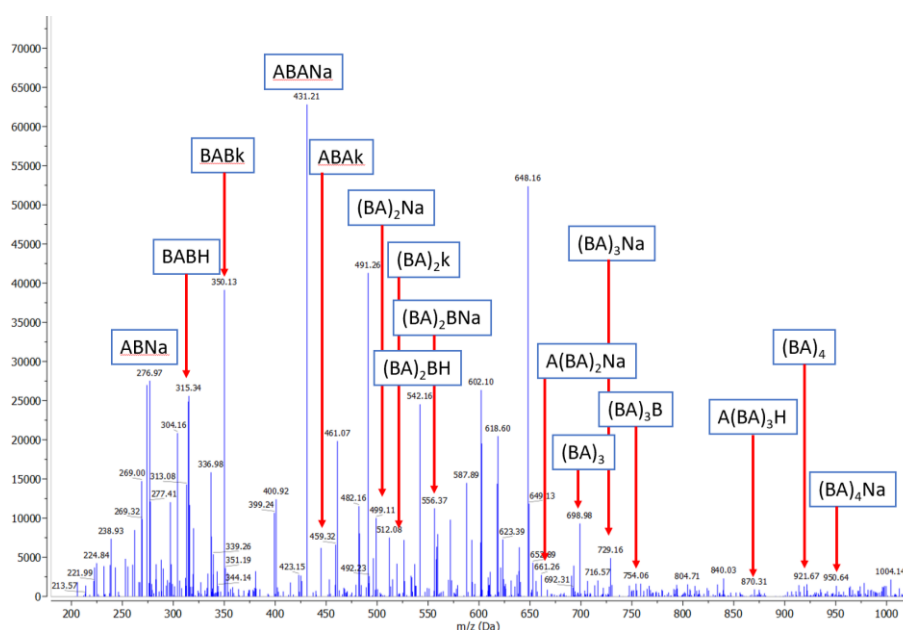

**Figure S4.** The ESI-MS spectrum of the enzymatically synthesized poly(glycerol terephthalate) obtained in *t*-BuOH at 70°C in the presence of Novozyme 435 lipase.

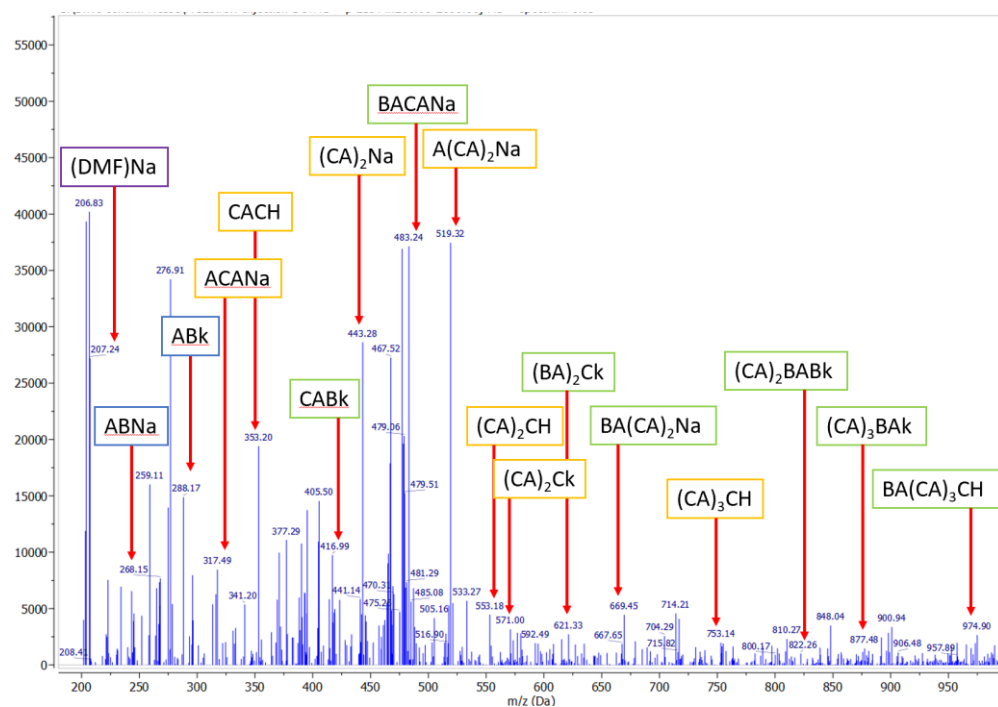

**Figure S5.** The ESI-MS spectrum of the enzymatically synthesized poly(glycerol adipate furanoate) obtained in *t*-BuOH at 70°C in the presence of covalently immobilized CalB lipase.

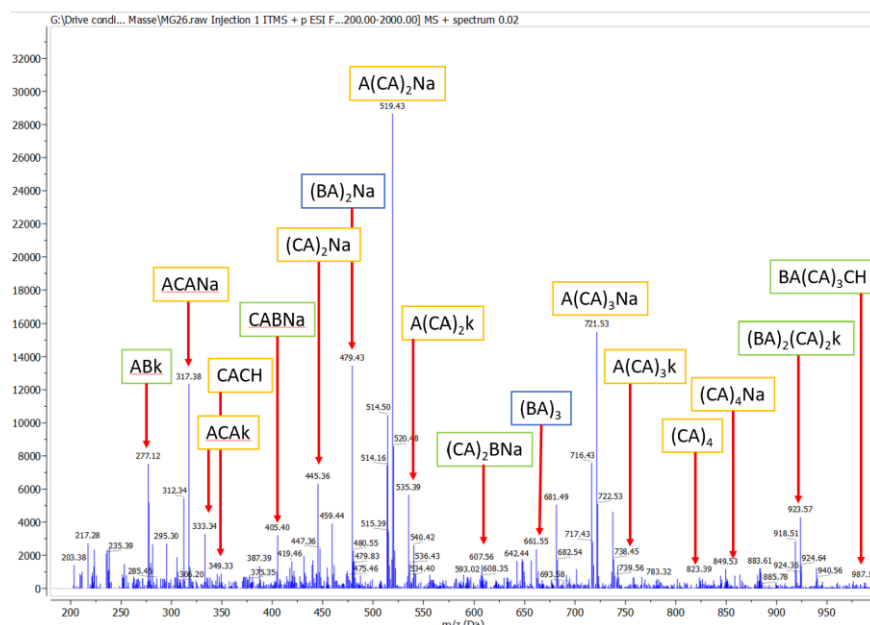

**Figure S6.** The ESI-MS spectrum of the enzymatically synthesized poly(glycerol adipate terephthalate) obtained in *t*-BuOH at 70°C in the presence of Novozyme 435 lipase.

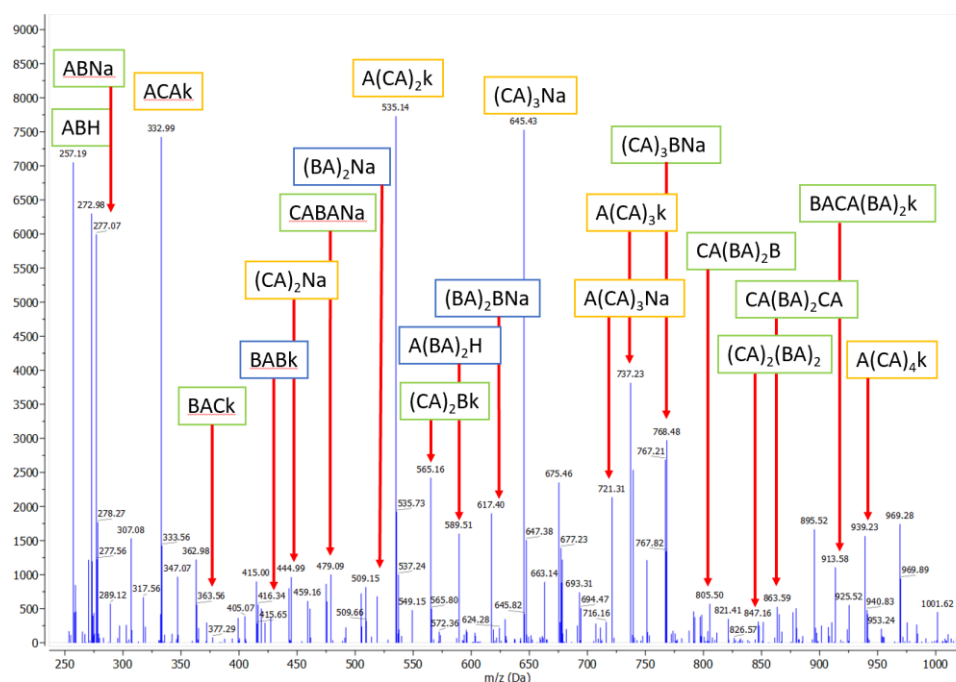

**Figure S7.** The ESI-MS spectrum of the enzymatically synthesized poly(glycerol erythritol adipate) obtained in *t*-BuOH at 70°C in the presence of Novozyme 435 lipase.

**Table S1.** The thermal parameters determined by differential scanning calorimetry in comparison with Mn, dispersity, and biodegradability.

| Product                   | T <sub>g</sub> [°C] | T <sub>m</sub> [°C] | ΔH <sub>m</sub> [J/g] | T <sub>c</sub> [°C] | Physical state | M <sub>n</sub> [g/mol] | Đ    | D <sub>t</sub> [%] |
|---------------------------|---------------------|---------------------|-----------------------|---------------------|----------------|------------------------|------|--------------------|
| Mixtures of ter-oligomers |                     |                     |                       |                     |                |                        |      |                    |
| BDO TA AA                 | -21.6               | 4.5                 | 5.05                  | 96.9                | L              | 1002                   | 1.21 | 36.48              |
| GLY ERI AA                | -28                 | n.d.                | n.d.                  | amorph              | L              | 844                    | 1.35 | 30.48              |
| BDO FDCA AA               | -43.4               | 74.4                | 7.15                  | amorph              | S              | 844                    | 1.06 | 29.00              |

|             |       |       |        |       |   |     |      |       |
|-------------|-------|-------|--------|-------|---|-----|------|-------|
| GLY FDCA AA | -31.6 | 108.9 | -22.48 | 66    | L | 439 | 1.25 | 22.55 |
| GLY TA AA   | -48.5 | 132.3 | 30.51  | 123.1 | L | 474 | 1.31 | 19.38 |

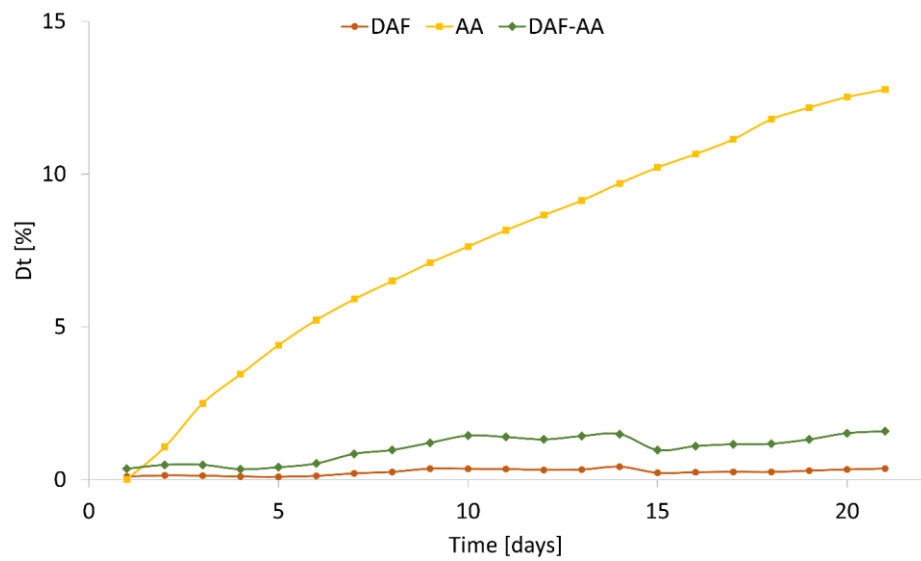

**Figure S8.** Evaluation of monomer and polyesteramide degradation following a 14-day incubation in a marine environment (the data were normalized by subtracting the values obtained for the control samples).

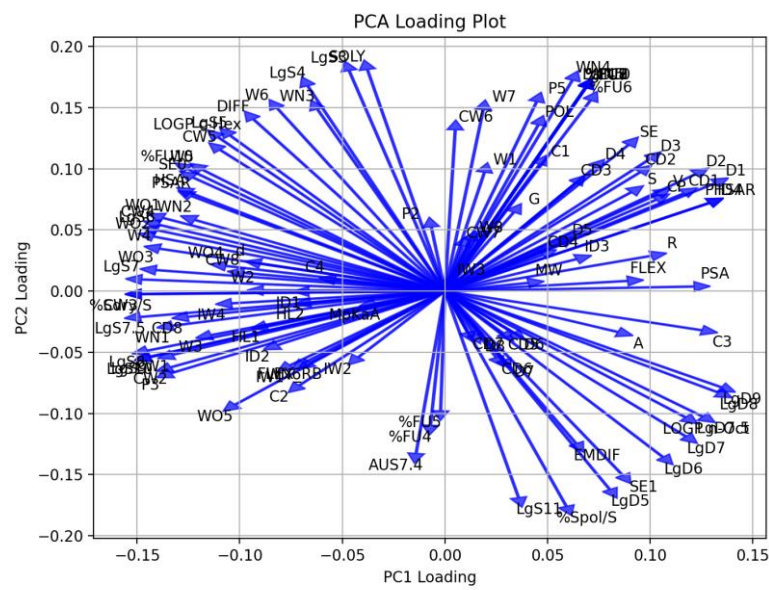

**Figure S9.** PCA Loading plot obtained by using Volsurf3.

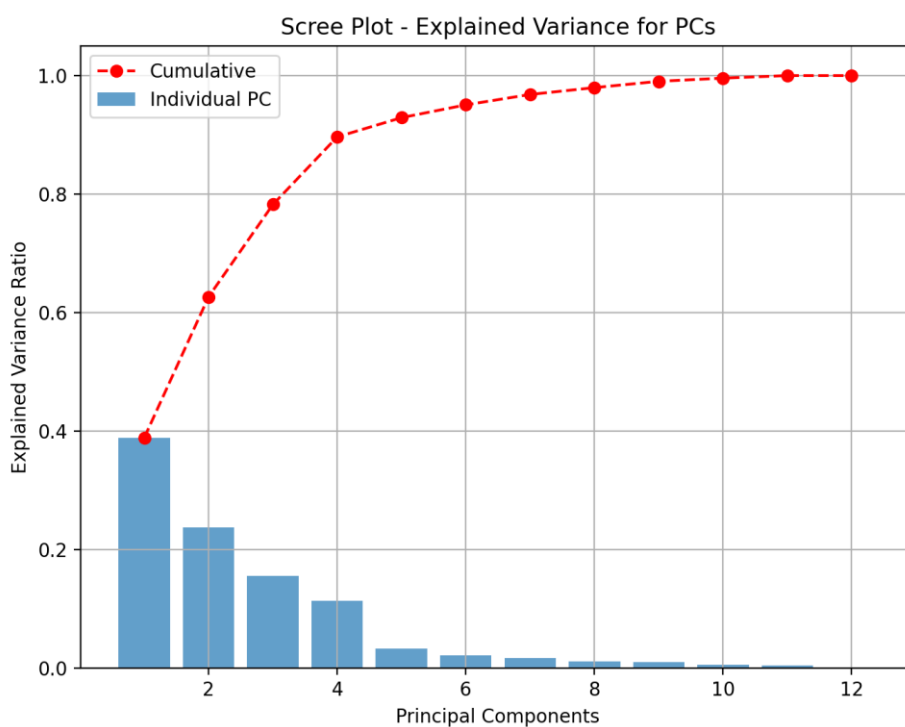

Figure S10. The Scree Plot- Explained variance plot for PCs.

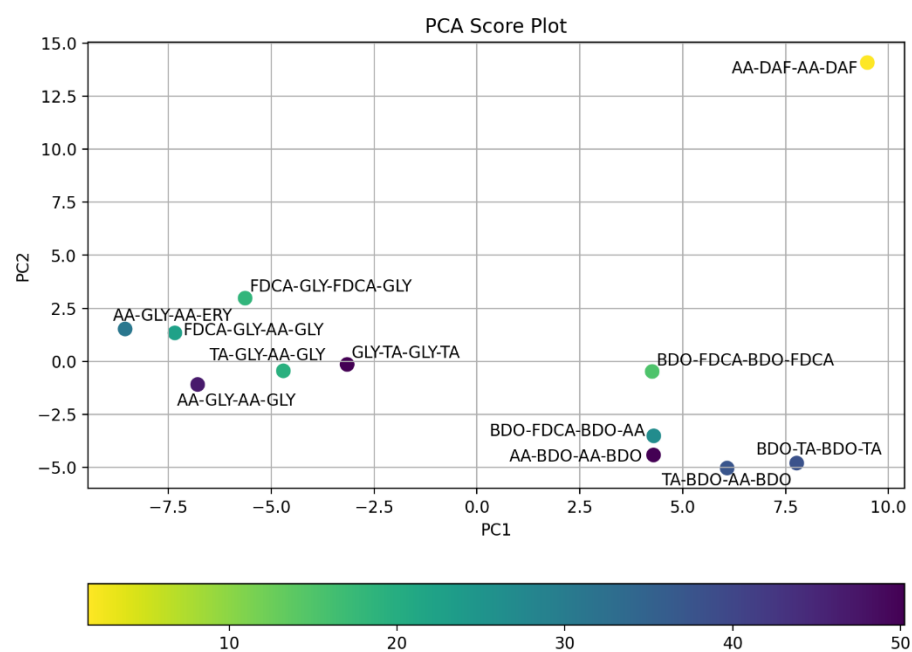

Figure S11. PCA score plots PC1 vs PC2, with objects coloured by biodegradation.

Table S2. PLS: data for fitting and validation of the model.

| LV | R2 (fitting) | Q2 (LOO-validation) |
|----|--------------|---------------------|
| 1  | 0.47         | Neg                 |
| 2  | 0.60         | 0.02                |
| 3  | 0.83         | Neg                 |

|   |      |      |
|---|------|------|
| 4 | 0.95 | 0.17 |
| 5 | 0.98 | 0.57 |

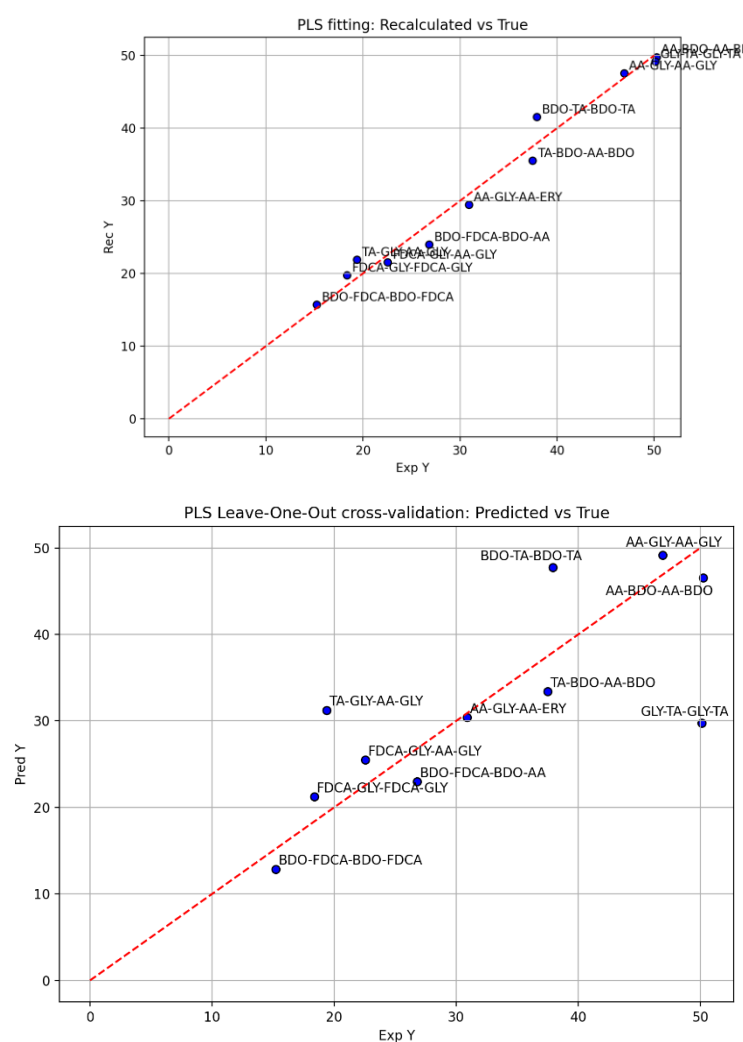

**Figure S12.** Recalculated and predicted biodegradation values for the PLS model based on 5 latent variables from 18 VolSurf<sup>3</sup> descriptors.

**Table S3.** A brief description of the Volsurf relevant descriptors for the present study.

| Volsurf+ descriptors                                  | Description                                                                                                                                                                                                        | Probe used for descriptor calculation |
|-------------------------------------------------------|--------------------------------------------------------------------------------------------------------------------------------------------------------------------------------------------------------------------|---------------------------------------|
| <b>LogP octanol/water (LOGP n-Oct)</b>                | The logarithm of the partition coefficient between 1-octanol and water is computed via a linear equation derived by fitting GRID-derived atom type to experimental data on n-octanol/water partition coefficients. | other                                 |
| <b>Integy moment (IW1-IW4)</b>                        | Express the unbalance between the centre of mass of a molecule and the barycenter of its hydrophilic or hydrophobic regions,                                                                                       | OH2                                   |
| <b>Capacity Factor (CW1-CW8)</b>                      | Represent the ratio of the hydrophilic volume over the total molecular surface and are calculated at eight different energy levels, the same levels used to compute the hydrophilic volumes.                       | OH2                                   |
| <b>Polar and Hydrophobic Surface Areas (PSA, HSA)</b> | The Polar Surface Area (PSA) is calculated via the sum of polar region contributions, while the Hydrophobic Surface Area (HSA) is calculated via the sum of hydrophobic region contributions                       | OH2, dry, O, N1                       |

|              |                                                                                                                                                                 |                        |
|--------------|-----------------------------------------------------------------------------------------------------------------------------------------------------------------|------------------------|
| EMDIF, EMDIS | Based on GRID potential (dE <sub>min</sub> ) and atom types, atoms are classified as polar or apolar; thus, differences and geometric distances are calculated. | electronic descriptors |
| MpKa         | Most acidic pKa value.                                                                                                                                          | other                  |

**Table S4.** The ecotoxicity test results obtained in the presence of *Aliivibrio fischeri*.

| Sample      | <i>Aliivibrio fischeri</i> |     |        |     |
|-------------|----------------------------|-----|--------|-----|
|             | I% 15'                     | SD  | I% 30' | SD  |
| BDO-FDCA-AA | 26.5                       | 2.6 | 21.7   | 2.0 |
| BDO-TA-AA   | 72.0                       | 0.6 | 68.3   | 0.6 |
| AA-GLY-ERI  | -5.1                       | 0.4 | -3.0   | 0.6 |
| AA-GLY-FDCA | 15.7                       | 1.3 | 15.5   | 1.8 |
| BDO-FDCA    | -2.5                       | 1.6 | -2.1   | 2.2 |
| GLY-FDCA    | 6.7                        | 0.4 | 7.7    | 1.0 |
| GLY-AA      | 2.6                        | 2.8 | 5.3    | 2.9 |
| AA-BDO      | 10.0                       | 3.2 | 11.2   | 2.4 |
| GLY         | -1.1                       | 3.0 | 0.5    | 2.9 |
| ERI         | 1.5                        | 2.5 | 4.0    | 2.2 |
| FDCA        | 10.2                       | 2.1 | 10.8   | 5.0 |
| BDO         | 8.4                        | 3.7 | 9.1    | 2.9 |
| AA          | 5.7                        | 4.9 | 6.8    | 0.9 |
| TA          |                            |     |        |     |

**Table S5.** The ecotoxicity test results obtained in the presence of *Phaeodactylum tricornutum*.

| Sample      | <i>Phaeodactylum tricornutum</i> |     |
|-------------|----------------------------------|-----|
|             | I% 72 h                          | SD  |
| BDO-FDCA-AA | -77.5                            | 2.5 |
| BDO-TA-AA   | -14.5                            | 7.1 |
| AA-GLY-ERI  | -25.9                            | 5.8 |
| AA-GLY-FDCA | -21.2                            | 4.7 |
| BDO-FDCA    | -70.6                            | 3.9 |
| GLY-FDCA    | -12.5                            | 0.0 |
| GLY-AA      | -33.4                            | 5.8 |
| AA-BDO      | -69.2                            | 4.7 |
| GLY         | -44.3                            | 4.6 |
| Erythritol  | -63.7                            | 3.1 |
| FDCA        | -25.2                            | 2.8 |
| BDO         | -30.2                            | 6.3 |
| AA          | -33.5                            | 3.5 |
| TA          | -75.5                            | 2.1 |

**Table S6.** The ecotoxicity test results obtained in the presence of *Paracentrotus lividus*.

| Sample      | <i>Paracentrotus lividus</i> |     |           |
|-------------|------------------------------|-----|-----------|
|             | Mean                         | SD  | Adj. Mean |
| BDO-FDCA-AA | 100.0                        | 0.0 | 100.0     |
| BDO-TA-AA   | 100.0                        | 0.0 | 100.0     |
| AA-GLY-ERI  | 55.0                         | 1.0 | 45.3      |
| AA-GLY-FDCA | 41.0                         | 1.0 | 28.3      |



|            |       |     |       |
|------------|-------|-----|-------|
| BDO-FDCA   | 100.0 | 0.0 | 100.0 |
| GLY-FDCA   | 94.0  | 1.0 | 91.5  |
| GLY-AA     | 100.0 | 0.0 | 100.0 |
| AA-BDO     | 100.0 | 0.0 | 100.0 |
| GLY        | 80.0  | 3.0 | 71.6  |
| Erythritol | 39.7  | 1.5 | 14.2  |
| FDCA       | 63.0  | 1.0 | 47.4  |
| BDO        | 91.3  | 0.6 | 87.7  |
| AA         | 61.7  | 1.5 | 45.5  |
| TA         | 8.0   | 1.5 | 0.0   |

**Table S7.** The ecotoxicity test results obtained in the presence of *Daphnia magna*.

| Sample      | <i>Daphnia magna</i> |          |            |          |
|-------------|----------------------|----------|------------|----------|
|             | Mean (24h)           | SD (24h) | Mean (48h) | SD (48h) |
| BDO-FDCA-AA | 0.0                  | 0.0      | 0.0        | 0.0      |
| BDO-TA-AA   | 0.0                  | 0.0      | 20.0       | 0.0      |
| AA-GLY-ERI  | 0.0                  | 0.0      | 30.0       | 14.1     |
| AA-GLY-FDCA | 0.0                  | 0.0      | 90.0       | 14.1     |
| BDO-FDCA    | 0.0                  | 0.0      | 20.0       | 0.0      |
| GLY-FDCA    | 10.0                 | 14.1     | 20.0       | 0.0      |
| GLY-AA      | 20.0                 | 0.0      | 20.0       | 0.0      |
| AA-BDO      | 10.0                 | 14.1     | 20.0       | 0.0      |
| GLY         | 0.0                  | 0.0      | 0.0        | 0.0      |
| ERI         | 60.0                 | 0.0      | 100.0      | 0.0      |
| FDCA        | 100.0                | 0.0      | 100.0      | 0.0      |
| BDO         | 10.0                 | 14.1     | 10.0       | 14.1     |
| AA          | 100.0                | 0.0      | 100.0      | 0.0      |
| TA          | 0.0                  | 0.0      | 0.0        | 0.0      |

**Table S8.** The ecotoxicity test results obtained in the presence of *Raphidocelis subcapitata*.

| Sample      | <i>Raphidocelis subcapitata</i> |      |
|-------------|---------------------------------|------|
|             | I% 72 h                         | SD   |
| BDO-FDCA-AA | -11.4                           | 2.4  |
| BDO-TA-AA   | 18.4                            | 1.4  |
| AA-GLY-ERI  | 3.1                             | 2.7  |
| AA-GLY-FDCA | 1.4                             | 2.4  |
| BDO-FDCA    | -25.3                           | 46.8 |
| GLY-FDCA    | 7.9                             | 3.3  |
| GLY-AA      | 1.4                             | 6.0  |
| AA-BDO      | 28.9                            | 3.5  |
| GLY         | 2.1                             | 5.3  |
| ERI         | -2.9                            | 1.2  |
| FDCA        | 41.9                            | 8.4  |
| BDO         | -4.4                            | 4.0  |
| AA          | 23.4                            | 5.0  |
| TA          | -10.3                           | 2.4  |
